# Supplementary material for: The first solid-state route to luminescent Au(I)—glutathionate and its pH-controlled transformation into ultrasmall oligomeric Au10–12(SG)10–12 nanoclusters for application in cancer radiotheraphy
Source: PubMed Central journal article supplement (PMC10277803; doi:10.3389/fchem.2023.1178225), 2023-06-05
Supplement: DataSheet1.pdf [file DataSheet1.pdf]

*Supplementary Material*

**The first solid-state route to luminescent Au(I)–glutathionate and its  
pH-controlled transformation into ultrasmall oligomeric  
Au<sub>10–12</sub>(SG)<sub>10–12</sub> nanoclusters for application in cancer radiotherapy**

Andrea Deák,<sup>1\*</sup> Pál T. Szabó,<sup>2</sup> Vendula Bednaříková,<sup>3</sup> Jaroslav Cihlář,<sup>3</sup> Attila Demeter,<sup>4</sup>  
Michaela Remešová,<sup>3</sup> Evelina Colacino<sup>5</sup> and Ladislav Čelko<sup>3</sup>

\* Correspondence: Andrea Deák: [deak.andrea@ttk.hu](mailto:deak.andrea@ttk.hu)

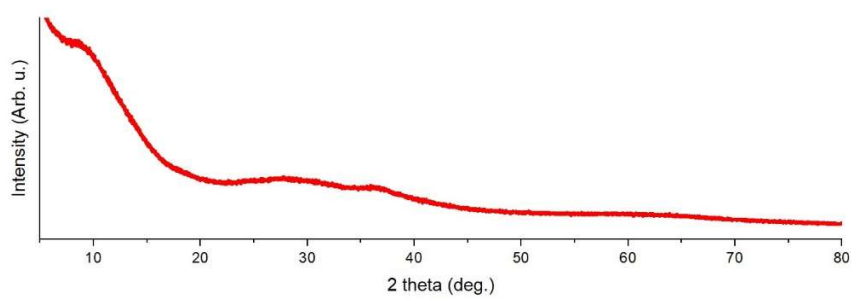

**Figure S1.** PXRD pattern of the  $[\text{Au}(\text{SG})]_n$  complex.

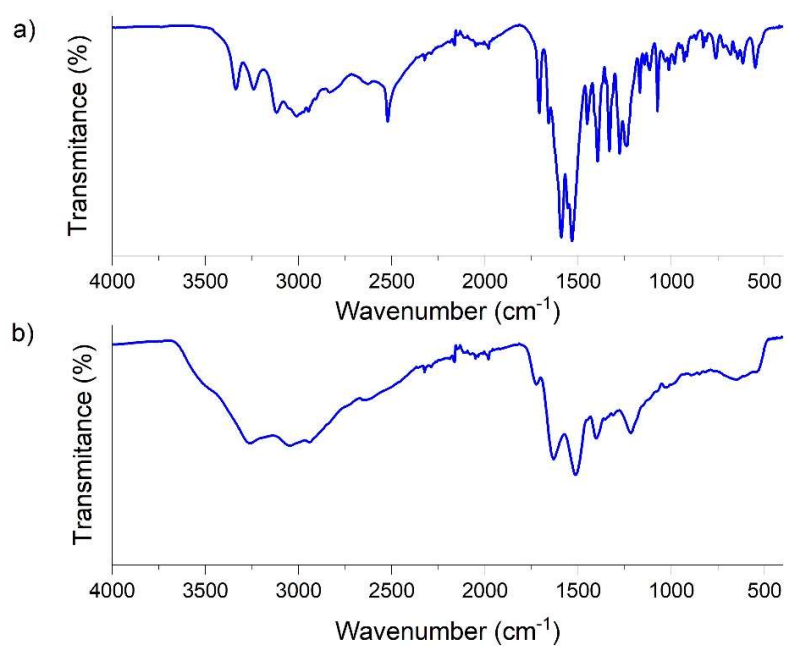

**Figure S2.** FT-IR spectrum of the a) free GSH ligand and b) its  $[\text{Au}(\text{SG})]_n$  complex.

The results of simultaneous thermal analysis (STA) are shown in Figures S3 and S4.

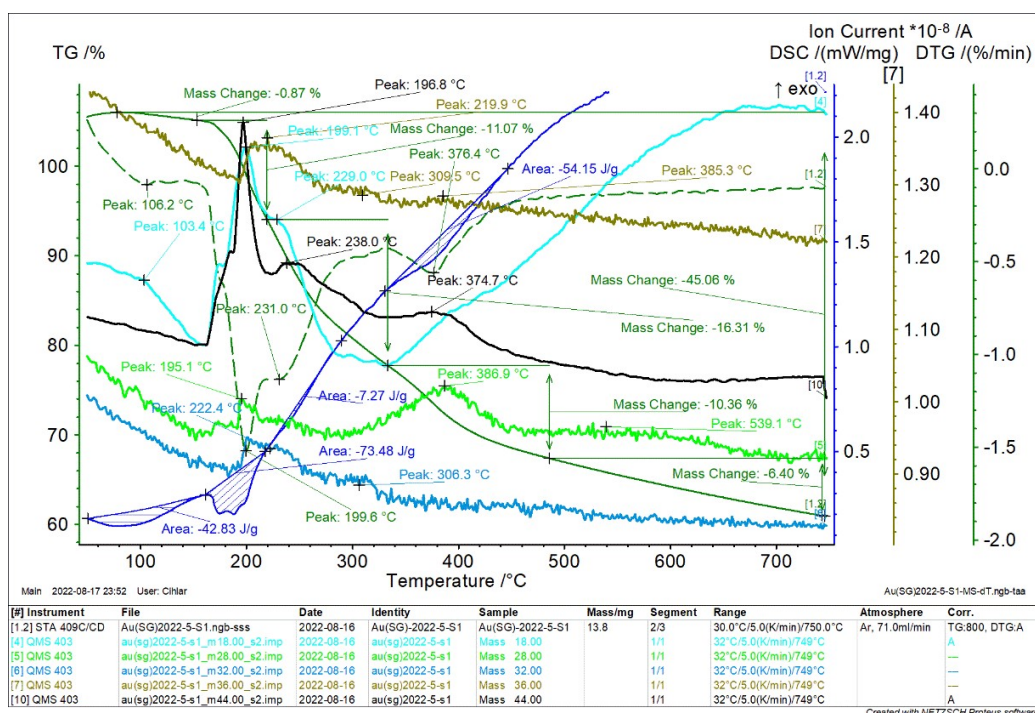

**Figure S3.** The graph of the STA (TGA-DSC-MS) of the  $[\text{Au}(\text{SG})]_n$  complex in the temperature range of 30–750 °C.

As shown in Figure S3, the TG curve or its derivative (DTG) showed four peaks (temperature range of 30–500 °C) and a mass loss without a peak for the  $[\text{Au}(\text{SG})]_n$  complex. The first maximum weight loss of around 100 °C (106.2 °C) was related to the release of physically bound water. The weight of the sample decreased by –0.87%. MS showed only  $\text{H}_2\text{O}$  peaks at 103.4 °C. The second maximum of weight losses around the temperature of 200 °C (199.1 °C) reached –11.07%. These decreases were caused by thermal decomposition of the glutathionate ligands of the  $[\text{Au}(\text{SG})]_n$  complex, mainly characterized by the release of  $\text{H}_2\text{O}$  (199.1 °C),  $\text{CO}_2$  (196.8 °C) and a smaller amount of  $\text{N}_2/\text{C}_2\text{H}_2$  (195.1 °C). The third maximum of weight losses around the temperature of 230 °C (231.0 °C) reached –16.31%. Also, these decreases were due to the continued thermal decomposition of the glutathionate ligands of the  $[\text{Au}(\text{SG})]_n$  complex, which released mainly  $\text{H}_2\text{O}$  (229.0 °C),  $\text{CO}_2$  (238.0 °C). The fourth maximum weight loss in the 327.6 to 376.4 °C temperature range was –10.36%. During this,  $\text{CO}_2$  (374.7 °C) and  $\text{N}_2/\text{C}_2\text{H}_2$  residues were released. Peaks of sulphur at 222.4 °C and 306.3 °C and an admixture of  $\text{HCl}$  in a wide temperature range of 219.9 to 389.2 °C were also detected. Weight losses without a maximum temperature range of 500–750 °C reached –6.4%. We can assume that by thermal decomposition of the  $[\text{Au}(\text{SG})]_n$  complex in an inert environment, part of the carbon from the thiolate will remain in the samples. Therefore, after reaching a temperature of 750 °C, the STA program included an additional step, the oxidation of carbon residues in an  $\text{Ar}/\text{O}_2$  atmosphere at a temperature of 750 °C for 15 minutes. The results in Figure S4 show that the samples contained 19.18% carbon. The total weight loss corresponding to the weight of the thiolate ligands (total weight loss minus the weight loss of water) is 63.32%. Based on the STA results, the calculated  $\text{Au}/\text{SG}$  molar ratio is 1/1.1. This somewhat higher

SG ratio can be related to the presence of residual water (hydrogen bonded to the carboxylic acid group of the glutathionate ligand, released at around 200 °C), whose contribution cannot be excluded from the 63.32% total weight loss.

DSC curves showed the endothermic course of all thermal events in the inert Ar atmosphere and the exothermic course of events in the Ar/O<sub>2</sub> oxidizing atmosphere.

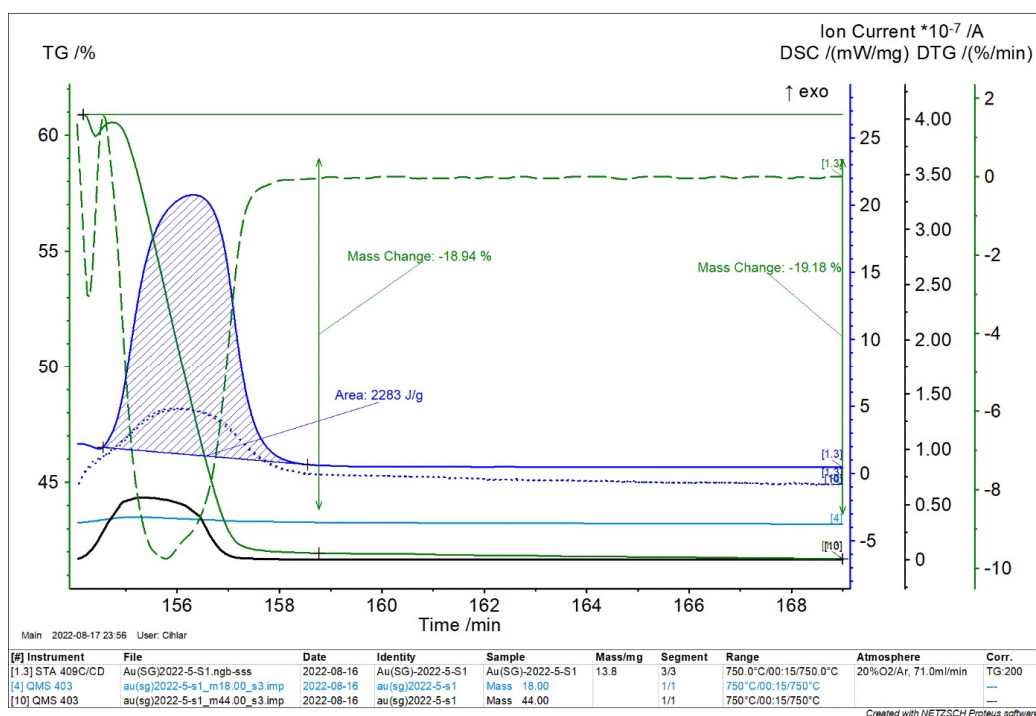

**Figure S4.** The graph of the STA shows the oxidation of [Au(SG)]<sub>n</sub> upon heating in Ar/O<sub>2</sub> atmosphere at a temperature of 750 °C for 15 minutes.

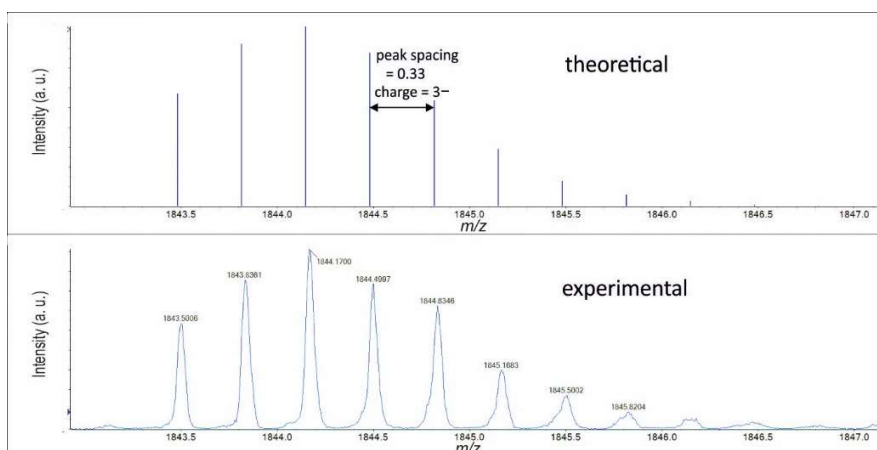

**Figure S5.** Theoretical (top) and experimental (bottom) isotope pattern of [Au<sub>11</sub>(SG)<sub>11</sub> - 3H<sup>+</sup>]<sup>3-</sup>

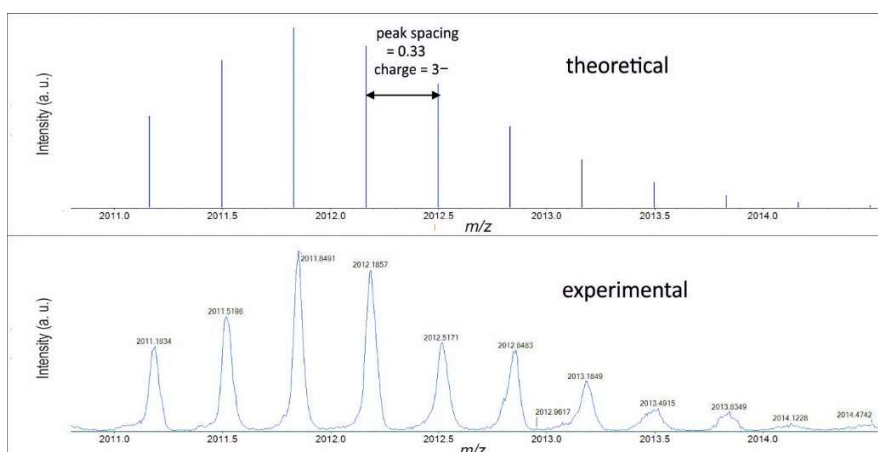

**Figure S6.** Theoretical (top) and experimental (bottom) isotope pattern of  $[\text{Au}_{12}(\text{SG})_{12} - 3\text{H}^+]^{3-}$

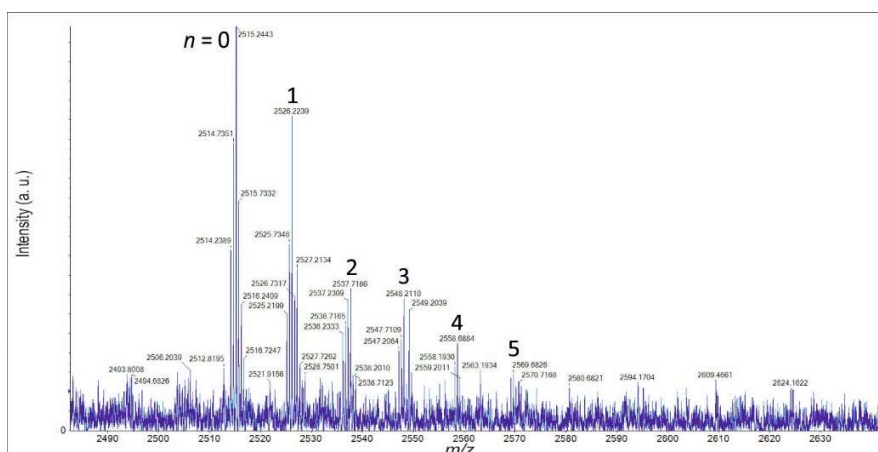

**Figure S7.** Expanded view of peaks belonging to  $[\text{Au}_{10}(\text{SG})_{10} - (2+n)\text{H} + n\text{Na}]^{2-}$ .

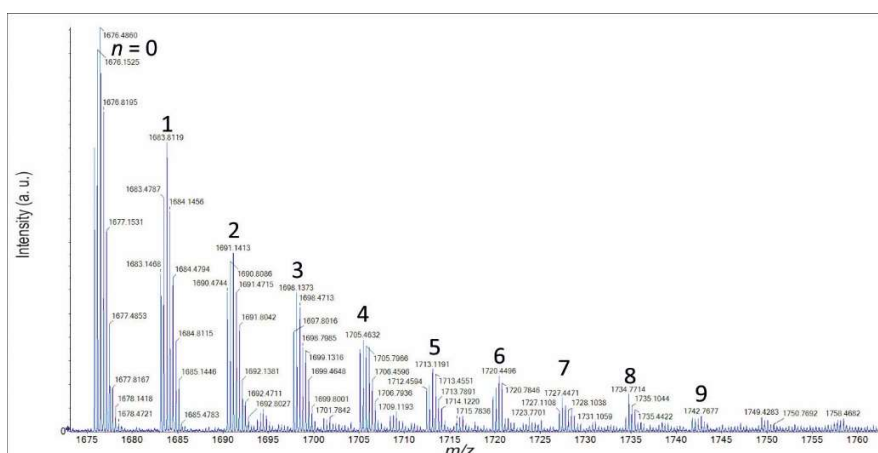

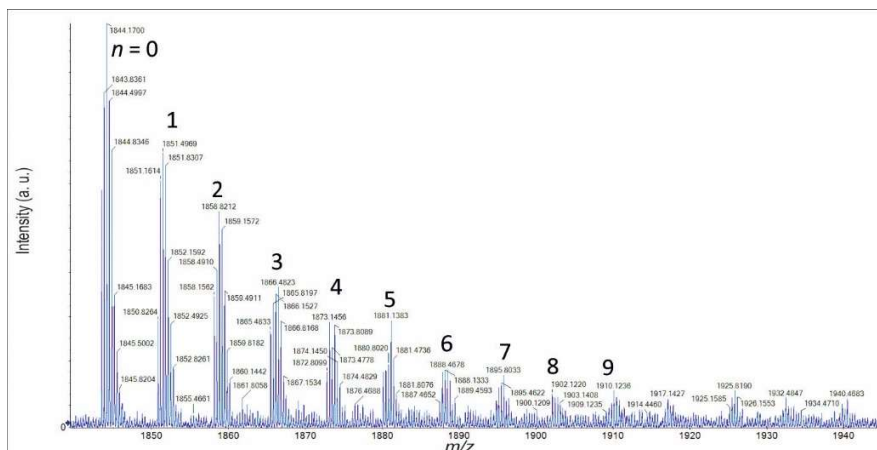

**Figure S9.** Expanded view of peaks belonging to  $[\text{Au}_{11}(\text{SG})_{11} - (3+n)\text{H} + n\text{Na}]^{3-}$ .

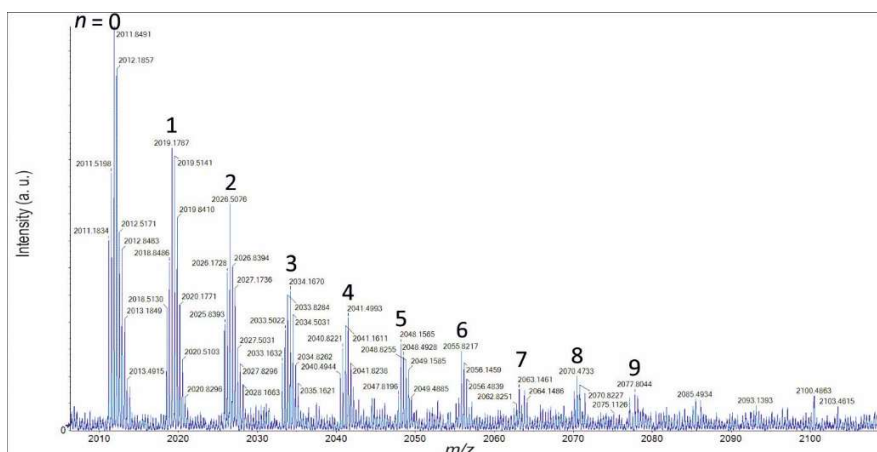

**Figure S10.** Expanded view of peaks belonging to  $[\text{Au}_{12}(\text{SG})_{12} - (3+n)\text{H} + n\text{Na}]^{3-}$ .

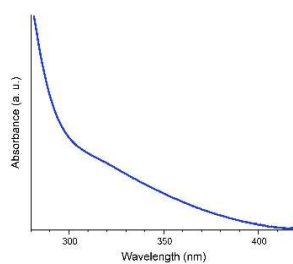

**Figure S11.** UV-Vis absorption spectrum of Au(I)-glutathionate at neutral pH.

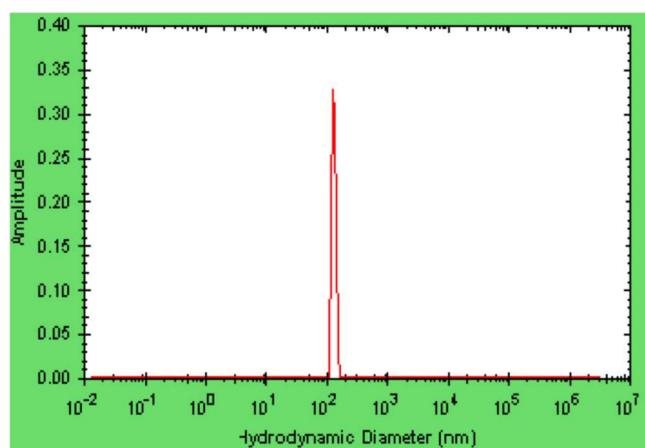

**Figure S12.** Hydrodynamic diameter of aggregated particles of oligomeric Au(I)–glutathionate NCs measured by DLS.

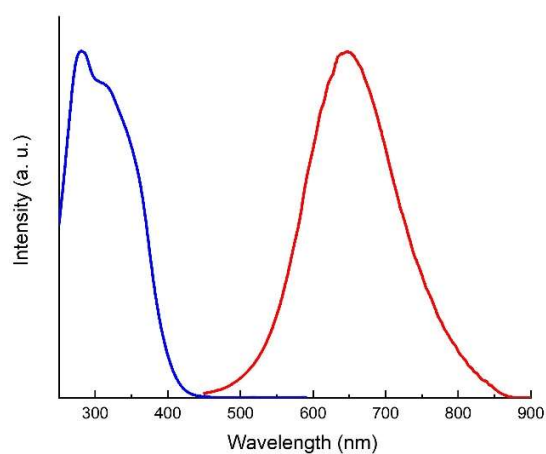

**Figure S13.** Photoluminescence (red line) and excitation (blue line) spectra of aggregated oligomeric Au(I)–glutathionate NCs.
